# Supplementary material
Source: PubMed Central journal article supplement (PMC1182308)
Supplement: mbc_E05-01-0020_1.pdf [file mbc_E05-01-0020_1.pdf]

**TABLE I. AP-3-Derived Vesicle Protein Identification**

| Category                      | Entry    | GI Number                                                  | Name                                                       | Peptide #         | Species            | AP-3  | Proteome |
|-------------------------------|----------|------------------------------------------------------------|------------------------------------------------------------|-------------------|--------------------|-------|----------|
| Coat proteins                 | 1        | 34853134                                                   | adaptor protein complex 3 beta 1 subunit (Beta-adaptin 3A) | 42                | Rattus norvegicus  | AP-3  |          |
|                               | 2        | 34857415                                                   | adaptor protein complex 3 beta 2 subunit (Beta-adaptin 3B) | 30                | Rattus norvegicus  | AP-3  |          |
|                               | 3        | 6671565                                                    | adaptor protein complex 3 delta subunit                    | 4                 | Mus musculus       | AP-3  |          |
|                               | 4        | 4502861                                                    | adaptor protein complex 3 sigma 1 subunit                  | 4                 | Homo sapiens       | AP-3  |          |
| Endocytic proteins            | 5        | 6978771                                                    | dynamitin II                                               | 13*               | Rattus norvegicus  | AP-3* |          |
|                               | 6        | 123647                                                     | hsc70                                                      | 17**              | Cricetulus griseus |       | CCV      |
|                               | 7        | 26006199                                                   | RME-8 (mKIAA0678 protein)                                  | 5                 | Mus musculus       | AP-3  |          |
| Rabs                          | 8        | 4758988                                                    | rab1a                                                      | 64**              | Homo sapiens       |       | CCV      |
|                               | 9        | 92339                                                      | rab1b                                                      | 75**              | Rattus norvegicus  |       | CCV      |
|                               | 10       | 6981452                                                    | rab3a                                                      | 22**              | Rattus norvegicus  | AP-3  | CCV      |
|                               | 11       | 13592037                                                   | rab3b                                                      | 12                | Rattus norvegicus  |       |          |
|                               | 12       | 19424194                                                   | rab3c                                                      | 22                | Rattus norvegicus  |       | CCV      |
|                               | 13       | 18034781                                                   | rab3d                                                      | 16                | Rattus norvegicus  |       |          |
|                               | 14       | 12083645                                                   | rab5a                                                      | 11                | Rattus norvegicus  |       | CCV      |
|                               | 15       | 34862219                                                   | rab5b                                                      | 13                | Rattus norvegicus  |       | CCV      |
|                               | 16       | 20072723                                                   | rab5c                                                      | 15                | Mus musculus       |       | CCV      |
|                               | 17       | 13027392                                                   | rab7                                                       | 1                 | Rattus norvegicus  |       | CCV      |
|                               | 18       | 420269                                                     | rab10                                                      | 26                | Rattus norvegicus  |       | CCV      |
|                               | 19       | 4758984                                                    | rab11a                                                     | 10                | Homo sapiens       |       | CCV      |
|                               | 20       | 420272                                                     | rab14                                                      | 31                | Mus musculus       | AP-3  | CCV      |
|                               | 21       | 15489394                                                   | rab15                                                      | 27                | Mus musculus       |       |          |
| GTPase interacting            | 22       | 11120714                                                   | arfaptin 1                                                 | 4                 | Rattus norvegicus  |       |          |
|                               | 23       | 31981363                                                   | arfaptin 2                                                 | 9                 | Mus musculus       |       |          |
|                               | 24       | 34864272                                                   | similar to guanine nucleotide exchange factor p532         | 16                | Rattus norvegicus  |       |          |
|                               | 25       | 38090233                                                   | oligophrenin RIKEN cDNA 9030420J04                         | 13                | Mus musculus       |       |          |
| Synaptic vesicle              | 26       | 38075087                                                   | SCAMP1, secretory carrier membrane protein 1               | 3                 | Mus musculus       |       | CCV      |
|                               | 27       | 6755404                                                    | SCAMP3, secretory carrier membrane protein 3               | 20                | Mus musculus       |       | CCV      |
|                               | 28       | 9507167                                                    | synaptogyrin 1                                             | 6                 | Rattus norvegicus  |       | CCV      |
|                               | 29       | 16758322                                                   | synaptogyrin 2                                             | 2                 | Rattus norvegicus  |       |          |
|                               | 30       | 34870526                                                   | synaptogyrin 3                                             | 9                 | Rattus norvegicus  |       | CCV      |
|                               | 31       | 6678195                                                    | synaptophysin                                              | 17                | Mus musculus       | AP-3  | CCV      |
|                               | 32       | 285432                                                     | synaptic vesicle protein SV2                               | 3                 | Rattus norvegicus  | AP-3  | CCV      |
|                               | 33       | 207308                                                     | thy-1 glycoprotein                                         | 1                 | Rattus norvegicus  |       | CCV      |
|                               | 34       | 34873852                                                   | vat1 protein                                               | 33                | Rattus norvegicus  | AP-3  | CCV      |
|                               | 35       | 2253399                                                    | VAMP2, vesicle associated membrane protein 2               | 18                | Mus musculus       | AP-3  | CCV      |
|                               | 36       | 3955096                                                    | vacuolar adenosine triphosphatase, V0 subunit A, isoform 1 | 5                 | Mus musculus       | AP-3  | CCV      |
|                               | 37       | 34851617                                                   | vacuolar adenosine triphosphatase, V0 subunit D, isoform 1 | 6                 | Rattus norvegicus  |       | CCV      |
|                               | 38       | 34869154                                                   | vacuolar adenosine triphosphatase, V1 subunit A, isoform 1 | 31                | Rattus norvegicus  |       | CCV      |
|                               | 39       | 1184661                                                    | vacuolar adenosine triphosphatase, V1 subunit B, isoform 2 | 27                | Mus musculus       |       | CCV      |
| 40                            | 38454230 | vacuolar adenosine triphosphatase, V1 subunit E, isoform 1 | 9                                                          | Rattus norvegicus |                    | CCV   |          |
| 41                            | 6755552  | zinc transporter 3; SCL 30, member 3                       | 31                                                         | Mus musculus      | AP-3               |       |          |
| Lysosome, protein degradation | 42       | 7230618                                                    | adaptor protein SETA 123, RUK1, CIN85                      | 12*               | Rattus norvegicus  |       |          |
|                               | 43       | 6680740                                                    | ataxia telangiectasia mutated homolog                      | 5                 | Mus musculus       | AP-3* |          |
|                               | 44       | 17390817                                                   | BLOC 1 complex, dysbindin                                  | 4                 | Mus musculus       | AP-3  |          |
|                               | 45       | 27684693                                                   | BLOC 1 complex, muted protein                              | 7                 | Rattus norvegicus  | AP-3  |          |
|                               | 46       | 34856819                                                   | BLOC 1 complex, pallidin                                   | 4                 | Rattus norvegicus  | AP-3  |          |
|                               | 47       | 13879528                                                   | BLOC 1 complex, snapap protein                             | 2                 | Mus musculus       | AP-3  |          |
|                               | 48       | 126378                                                     | LAMP 1                                                     | 2                 | Rattus norvegicus  | AP-3  |          |
|                               | 49       | 126382                                                     | LAMP 2                                                     | 2                 | Rattus norvegicus  | AP-3  |          |
|                               | 50       | 34863475                                                   | protein-tyrosine phosphatase MEG2; PTPase-MEG2             | 17                | Rattus norvegicus  |       |          |
|                               | 51       | 13938659                                                   | Sorcs1 protein                                             | 13*               | Mus musculus       |       |          |
|                               | 52       | 34869235                                                   | sorting nexin 4                                            | 5                 | Rattus norvegicus  |       |          |
|                               | 53       | 27705482                                                   | TMS-2/KIAA1253                                             | 2                 | Rattus norvegicus  | AP-3  |          |
|                               | 54       | 29293817                                                   | vacuole 14 protein; Vac14 protein; hydin (KIAA0274)        | 3                 | Rattus norvegicus  |       |          |
|                               | 55       | 7514115                                                    | vacuolar protein sorting protein 33b                       | 6*                | Rattus norvegicus  |       |          |
| 56                            | 16758296 | VAMP7 vesicle associated membrane protein 7                | 7                                                          | Rattus norvegicus | AP-3               |       |          |
| 57                            | 91870    | polyubiquitin                                              | 9                                                          | Mus musculus      | AP-3               |       |          |
| 58                            | 38077035 | ubiquitin-protein ligase ( RIKEN cDNA 4432411E13 )         | 10                                                         | Mus musculus      |                    |       |          |
| 59                            | 33468901 | hect                                                       | 11                                                         | Mus musculus      |                    |       |          |

|                              |          |                                                |                                                                       |                   |                   |      |
|------------------------------|----------|------------------------------------------------|-----------------------------------------------------------------------|-------------------|-------------------|------|
| <b>Cytoskeleton</b>          | 60       | 12711694                                       | dynein, cytoplasmic, heavy chain 2                                    | 10                | Rattus norvegicus |      |
|                              | 61       | 38091406                                       | dynein, axonemal, heavy polypeptide 9                                 | 17                | Mus musculus      |      |
|                              | 62       | 34875563                                       | dynein, axonemal, Beta heavy chain outer-arm                          | 17                | Rattus norvegicus |      |
|                              | 63       | 38092571                                       | dynein heavy chain (RIKEN cDNA 2810003K23)                            | 18                | Mus musculus      |      |
|                              | 64       | 38087391                                       | similar to axonemal heavy chain dynein type 3                         | 12                | Mus musculus      |      |
|                              | 65       | 4512330                                        | kinesin kif1B-beta                                                    | 6                 | Mus musculus      |      |
|                              | 66       | 45476577                                       | kinesin Kif11                                                         | 10                | Mus musculus      |      |
|                              | 67       | 33285017                                       | desmuslin                                                             | 8                 | Rattus norvegicus |      |
|                              | 68       | 138531                                         | vimentin                                                              | 2                 | Rattus norvegicus | AP-3 |
|                              | 69       | 34874618                                       | similar to bullous pemphigoid antigen 1-b                             | 15                | Rattus norvegicus |      |
|                              | 70       | 19882221                                       | bullous pemphigoid antigen 1; dystonin isoform b                      | 21                | Mus musculus      |      |
|                              | 71       | 19745146                                       | bullous pemphigoid antigen 1; dystonin isoform e                      | 17                | Mus musculus      |      |
|                              | 72       | 38077811                                       | plectin 1                                                             | 9                 | Mus musculus      |      |
|                              | 73       | 41322931                                       | plectin 1 isoform 6                                                   | 10                | Mus musculus      |      |
|                              | 74       | 25021548                                       | microtubule-actin crosslinking factor 1                               | 11                | Mus musculus      |      |
|                              | 75       | 14285343                                       | microtubule-actin crosslinking factor 1, Actin cross-linking family 7 | 11                | Mus musculus      |      |
|                              | 76       | 34870961                                       | similar to macrophin 1 isoform 4                                      | 13                | Rattus norvegicus |      |
|                              | 77       | 6981696                                        | dystrophin-related protein 1 (utrophin)                               | 9                 | Rattus norvegicus |      |
|                              | 78       | 34852958                                       | spectrin alpha 1 (protein XP_346647)                                  | 10                | Rattus norvegicus |      |
|                              | 79       | 34856454                                       | titin                                                                 | 33                | Rattus norvegicus |      |
| 80                           | 7441396  | tropomyosin                                    | 13                                                                    | Rattus norvegicus |                   |      |
| <b>Kinases</b>               | 81       | 11560119                                       | casein kinase 1 gamma 1                                               | 3                 | Rattus norvegicus |      |
|                              | 82       | 16758554                                       | phosphatidylinositol 4-kinase type II                                 | 38**              | Rattus norvegicus | AP-3 |
|                              | 83       | 34872893                                       | protein kinase Njmu-R1                                                | 8                 | Rattus norvegicus |      |
|                              | 84       | 6679313                                        | protein kinase C, alpha binding protein                               | 8                 | Mus musculus      |      |
| <b>Golgi complex</b>         | 85       | 20302065                                       | golgi-associated protein GCP360                                       | 23                | Rattus norvegicus |      |
|                              | 86       | 20127150                                       | golgi autoantigen, golgin subfamily a, 4; golgin-245                  | 6                 | Mus musculus      |      |
|                              | 87       | 32469711                                       | GRIP and coiled-coil domain-containing protein 2                      | 16                | Rattus norvegicus |      |
|                              | 88       | 11693144                                       | myomegalin                                                            | 9                 | Rattus norvegicus |      |
|                              | 89       | 4852562                                        | similar to Golgi coiled coil protein GCC185                           | 14                | Rattus norvegicus |      |
| <b>Endoplasmic reticulum</b> | 90       | 7949029                                        | CDP-diacylglycerol synthase                                           | 14                | Mus musculus      |      |
|                              | 91       | 19424302                                       | glucosyltransferase UGGT                                              | 8                 | Rattus norvegicus |      |
|                              | 92       | 13929188                                       | nogo-A protein                                                        | 14                | Rattus norvegicus |      |
|                              | 93       | 6822249                                        | nogo-B protein                                                        | 13                | Rattus norvegicus | CCV  |
| <b>Early endosome</b>        | 94       | 34222535                                       | early endosome antigen 1                                              | 9                 | Mus musculus      |      |
| <b>Other</b>                 | 95       | 16758842                                       | amyloid beta (A4) precursor protein-binding, family B, member 3       | 14                | Rattus norvegicus |      |
|                              | 96       | 23346593                                       | ATP-binding cassette, sub-family A (ABC1), member 8a                  | 17                | Mus musculus      |      |
|                              | 97       | 23956076                                       | ATP-binding cassette, sub-family A (ABC1), member 8b                  | 23                | Mus musculus      |      |
|                              | 98       | 477319                                         | calpain (EC 3.4.22.17) large chain 2                                  | 10                | Rattus norvegicus |      |
|                              | 99       | 17148511                                       | choline transporter like protein variant a                            | 3                 | Rattus norvegicus |      |
|                              | 100      | 9910352                                        | endophilin B2                                                         | 14                | Homo sapiens      |      |
|                              | 101      | 34873536                                       | GPR158-like 1 receptor (similar to mKIAA1136 protein)                 | 8                 | Rattus norvegicus |      |
|                              | 102      | 1706187                                        | high-affinity cationic amino acid transporter-1 (CAT-1)               | 4*                | Rattus norvegicus |      |
|                              | 103      | 12018244                                       | metastasis Associated protein 1                                       | 6*                | Rattus norvegicus |      |
|                              | 104      | 33989897                                       | NESCA, RUN and SH3 domain containing 1                                | 12                | Mus musculus      |      |
|                              | 105      | 13507628                                       | neurobeachin                                                          | 17                | Mus musculus      |      |
|                              | 106      | 9507118                                        | OCTN2 Slc22a5                                                         | 1                 | Rattus norvegicus |      |
|                              | 107      | 24212084                                       | piccolo protein, Presynaptic cytomatrix protein, Aczonin              | 11                | Mus musculus      |      |
|                              | 108      | 9790169                                        | proteolipid protein 2                                                 | 2                 | Mus musculus      |      |
|                              | 109      | 34878924                                       | protocadherin gamma A7                                                | 22                | Rattus norvegicus |      |
|                              | 110      | 34881409                                       | protocadherin 19, similar to                                          | 21                | Rattus norvegicus |      |
|                              | 111      | 13929034                                       | solute carrier family 27 (fatty acid transporter) member 2            | 3*                | Rattus norvegicus |      |
|                              | 112      | 17865500                                       | sodium/potassium/calcium exchanger 1 precursor                        | 7*                | Rattus norvegicus |      |
|                              | 113      | 20270273                                       | synovial sarcoma, X breakpoint 2 interacting protein                  | 11                | Mus musculus      |      |
|                              | 114      | 38454226                                       | tumor protein D52-like 2                                              | 45                | Rattus norvegicus |      |
| 115                          | 34854984 | similar to PC-1                                | 14                                                                    | Rattus norvegicus |                   |      |
| 116                          | 16933553 | tumor endothelial marker 8 isoform 3 precursor | 5*                                                                    | Homo sapiens      | AP-3              |      |
| 117                          | 41281746 | VEPH isoform A                                 | 13                                                                    | Mus musculus      |                   |      |
| 118                          | 5833120  | voltage-gated sodium channel Na(v)1.9/NaN      | 8                                                                     | Mus musculus      |                   |      |
| 119                          | 34859400 | WD repeat domain 11, similar to                | 4                                                                     | Rattus norvegicus |                   |      |
| <b>Metabolism</b>            | 120      | 543359                                         | 6-phosphofructo-2-kinase                                              | 4*                | Rattus norvegicus | CCV  |
|                              | 121      | 204615                                         | hexokinase type II                                                    | 3                 | Rattus norvegicus |      |

**New Genes**

|     |          |                                          |    |                   |
|-----|----------|------------------------------------------|----|-------------------|
| 122 | 38049648 | hypothetical protein                     | 4  | Mus musculus      |
| 123 | 38092053 | hypothetical protein                     | 31 | Mus musculus      |
| 124 | 34880553 | hypothetical protein FLJ14503            | 10 | Rattus norvegicus |
| 125 | 30424677 | RIKEN cDNA A930021H16                    | 9  | Mus musculus      |
| 126 | 34856548 | RIKEN cDNA B230365D05                    | 12 | Rattus norvegicus |
| 127 | 26458730 | RIKEN visual cortex cDNA clone           | 2  | Mus musculus      |
| 128 | 26327937 | unnamed protein product                  | 13 | Mus musculus      |
| 129 | 28972251 | mKIAA0493 protein                        | 23 | Mus musculus      |
| 130 | 37359752 | mKIAA0051 protein                        | 9  | Mus musculus      |
| 131 | 34866451 | similar to KIAA0342 protein              | 7  | Rattus norvegicus |
| 132 | 34856467 | similar to mKIAA1927 protein             | 17 | Rattus norvegicus |
| 133 | 38074469 | similar to KIAA1074 protein              | 22 | Rattus norvegicus |
| 134 | 20071522 | similar to hypothetical protein FLJ10900 | 12 | Mus musculus      |
| 135 | 26458730 | RIKEN visual cortex cDNA clone           | 2  | Mus musculus      |
| 136 | 22834095 | IMAGE 6530351                            | 2  | Mus musculus      |
| 137 | 18510397 | IMAGE 5504109                            | 2  | Mus musculus      |
